# Supplementary material for: How do postgraduate online distance learners understand ‘belongingness’ and why it matters: a qualitative study
Source: Research Square preprint supplement (doi:10.21203/rs.3.rs-7497616/v1), 2026-02-24
Supplement: Supplementary file 1 [file 9cea0b1c592846bcf3cca580.docx]

**Interview Guide**

1. Can you please tell me why you chose to enroll in this online distance learning program?
2. What does a sense of belongingness and lack of belongingness mean to you?
3. Does this sense of belongingness matter to you in the context of online distance learning? If yes, how?
4. Can you describe your best online distance learning experience? Why do you consider it the best?
5. Can you describe your worst online distance learning experience? Why do you consider it the worst?
6. Can you describe your team or group experience? Do you feel that you belong to the team/group? If yes, what contributes to that sense of belongingness?
7. In your opinion, what makes you feel that you don’t belong to a team or group?
8. Do you think your sense of belongingness affects your learning?
9. Do you feel that your peers play a role in promoting and sustaining a sense of belongingness? If yes, how?
10. Do you feel that your tutors or facilitators are important in fostering a sense of belongingness? If yes, how?
11. Do you think professional services staff (e.g., administrative or support staff) are important in promoting a sense of belongingness? If yes, how?
12. In your opinion, how can belongingness in online distance learning be fostered?
